# Supplementary material for: Association of T-Zone Reticular Networks and Conduits with Ectopic Lymphoid Tissues in Mice and Humans
Source: PubMed Central journal article supplement — Am J Pathol. 2011 Apr;178(4):1662–75. doi: 10.1016/j.ajpath.2010.12.039 (PMC3070229; doi:10.1016/j.ajpath.2010.12.039), 2011-04
Supplement: mmc1.pdf [file mmc1.pdf]

Tonsil

Human podoplanin, **CD21**

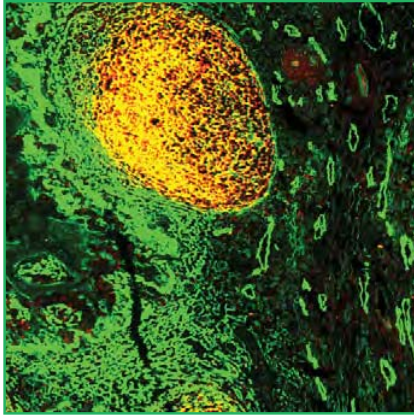

clone 4D5aE5E6  
(Mouse IgG1, Serotec)

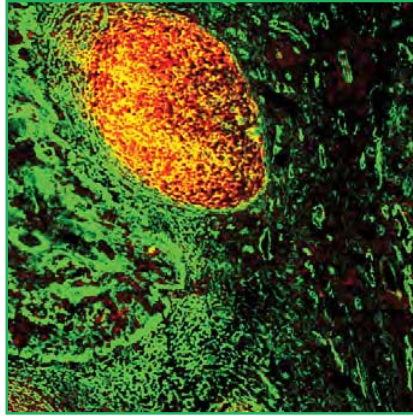

rabbit polyclonal ab  
(Abcam ab10274)

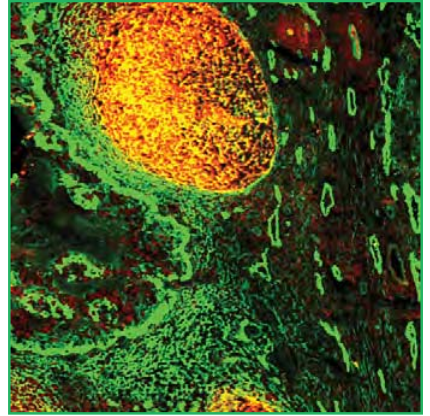

clone D2-40  
(Mouse IgG1, Signet)

**Link et al. supplemental figure S1.**
