# Supplementary material for: Association of T-Zone Reticular Networks and Conduits with Ectopic Lymphoid Tissues in Mice and Humans
Source: PubMed Central journal article supplement — Am J Pathol. 2011 Apr;178(4):1662–75. doi: 10.1016/j.ajpath.2010.12.039 (PMC3070229; doi:10.1016/j.ajpath.2010.12.039), 2011-04
Supplement: mmc6.pdf [file mmc6.pdf]

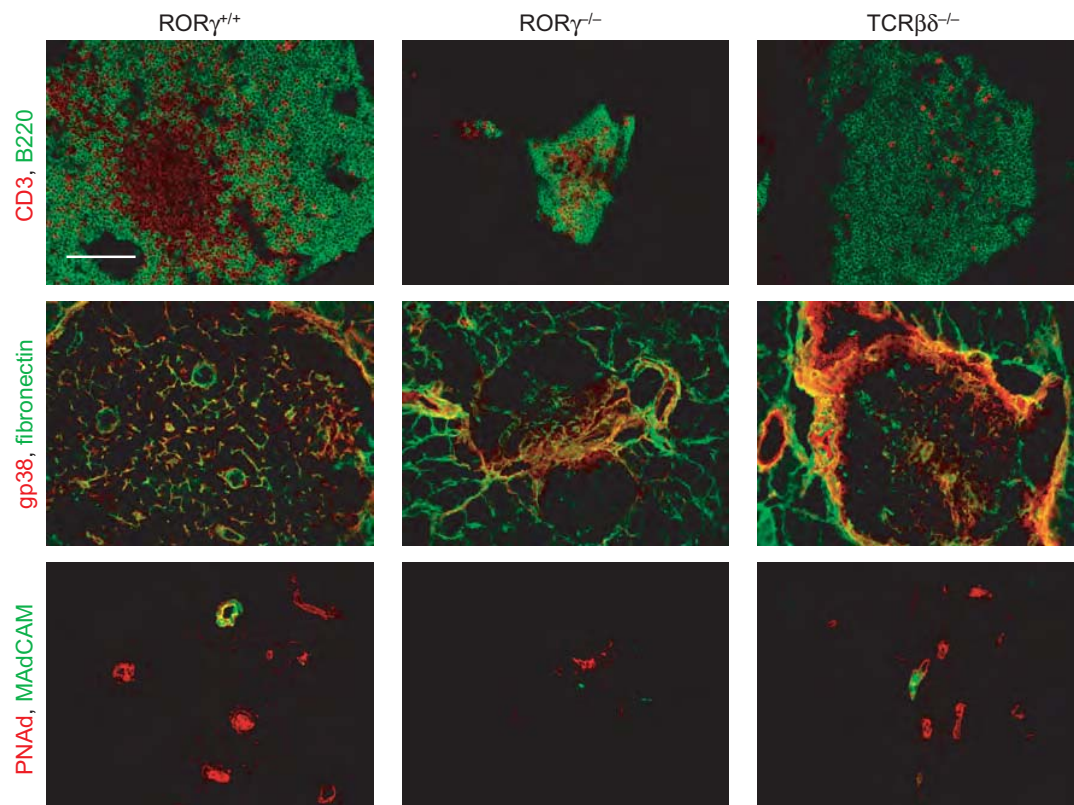

Link et al., supplemental figure S6.
